# Supplementary material for: Evolution of a polymodal sensory response network
Source: PubMed Central journal article supplement (PMC2636771; doi:10.1186/1741-7007-6-52), 2008-12-15
Supplement: 1741-7007-6-52-S2.pdf [file 1741-7007-6-52-S2.pdf]

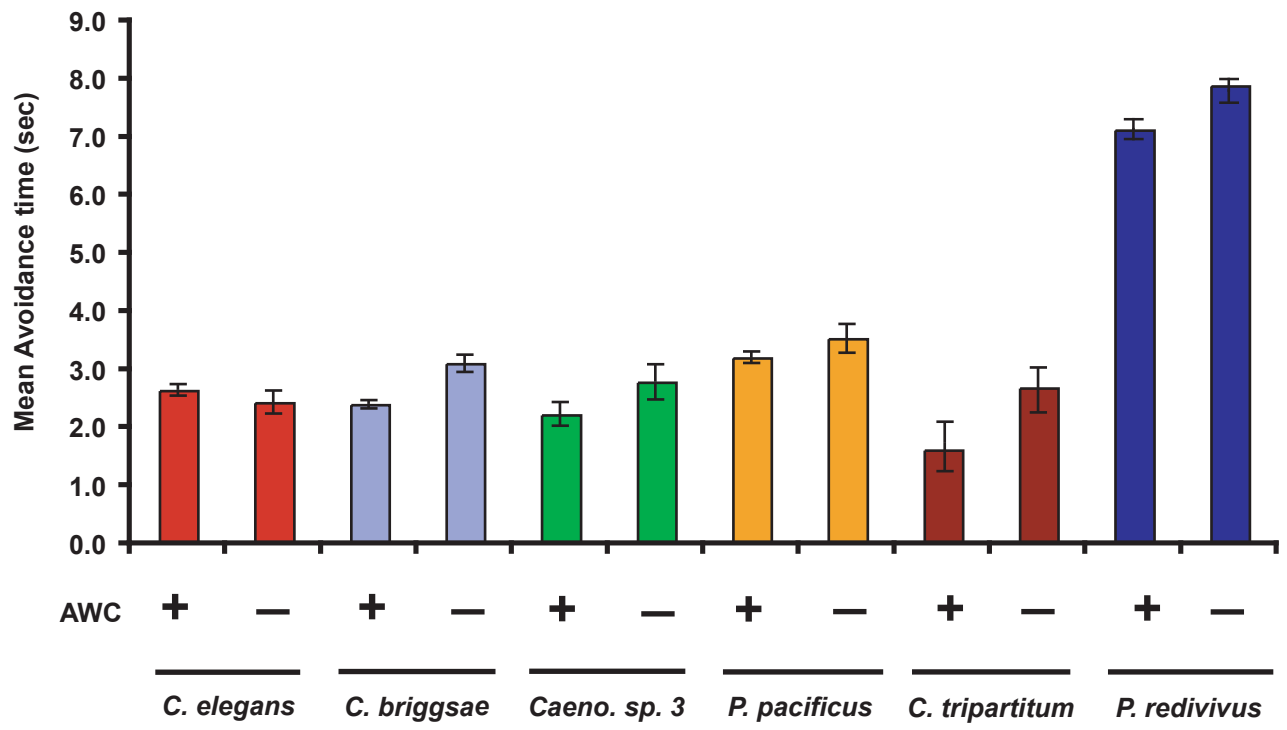

Supplementary Figure S1

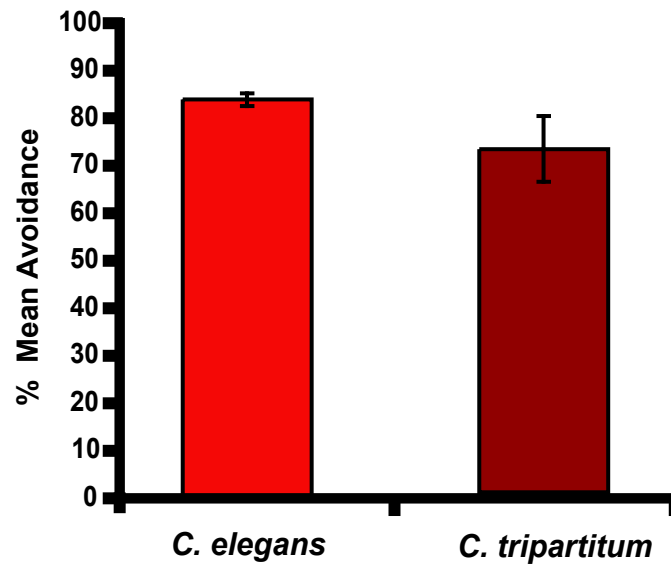

Supplementary Figure S2

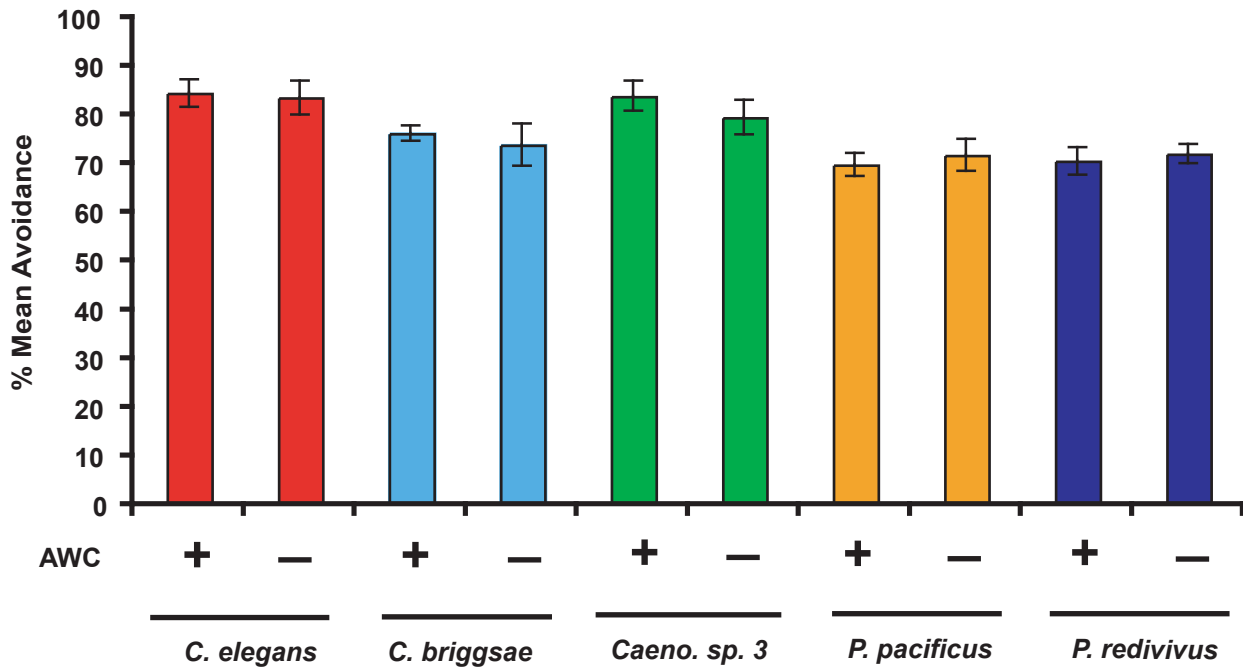

Supplementary Figure S3

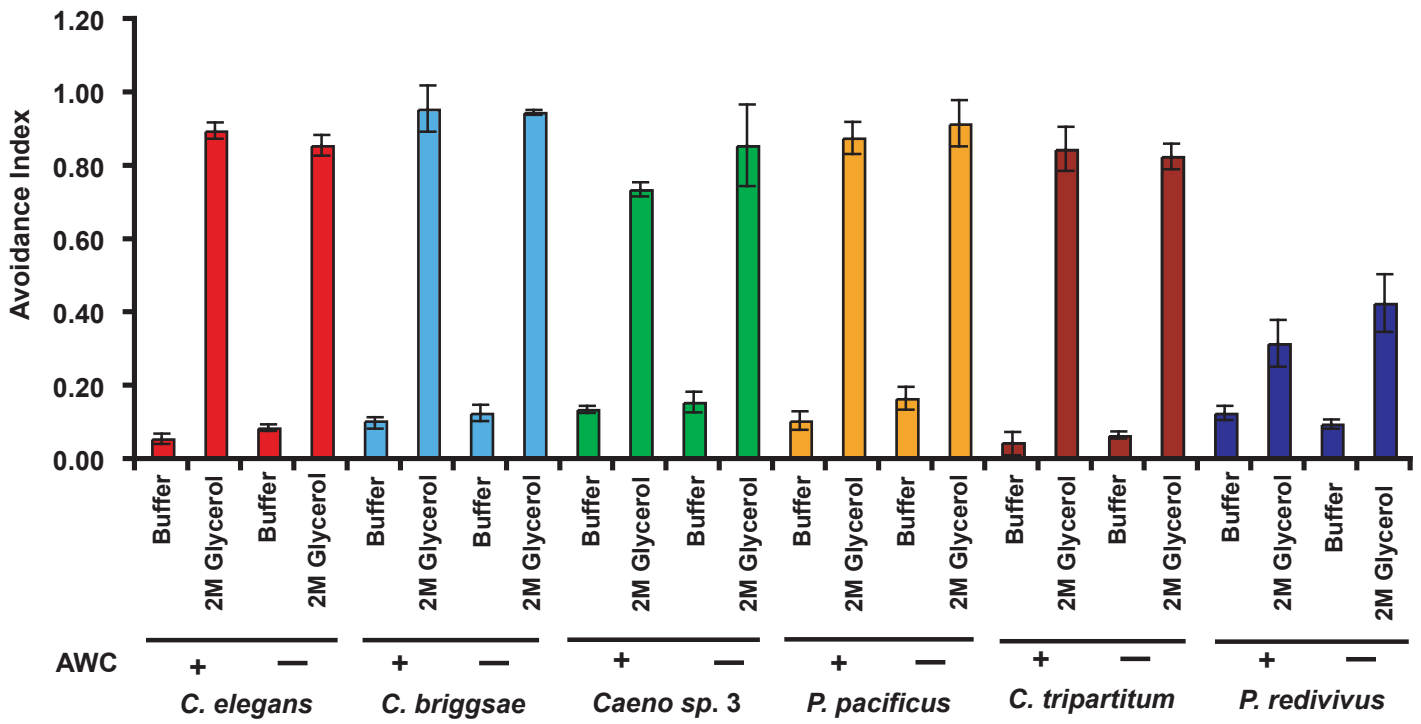

Supplementary Figure S4
